# Supplementary material for: BCG Substrains Change Their Outermost Surface as a Function of Growth Media
Source: MDPI journal article supplement (doi:10.3390/vaccines10010040), 2021-12-29
Supplement: s1 [file s1]

# Supplementary Materials:

The following are available online at <https://www.mdpi.com/article/10.3390/vaccines10010040/s1>, Figure S1: Macroscopic appearance of BCG substrains cultures grown on Sauton media, Table S1: List of primers used in qRT-PCR assays.

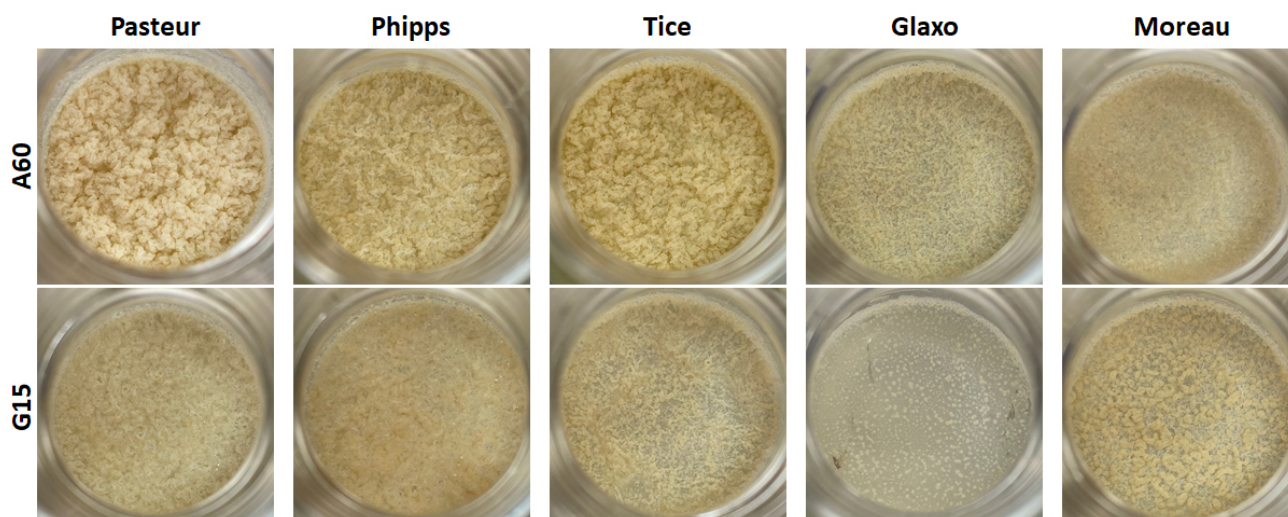

**Figure S1.** Macroscopic appearance of BCG substrains cultures grown on two Sauton media (A60 and G15).

**Table S1.** List of primers used in qRT-PCR assays.

| Primer name        | Sequence 5'-3'       | Observations                                                                                                                                                                                       |
|--------------------|----------------------|----------------------------------------------------------------------------------------------------------------------------------------------------------------------------------------------------|
| <i>Rv0577_Fw</i>   | CTTCAGACCACCGATCAGTC | Putative glyoxylase CFP32: Protein involved in the methylglyoxal detoxification pathway. Induces maturation of dendritic cells in a TLR2-dependent manner. Induces Th1-polarized immune responses. |
| <i>Rv0577_Rv</i>   | GTTGTCGTCGTAACCCAG   |                                                                                                                                                                                                    |
| <i>papA5_Fw</i>    | CTTGGAACCCACCCAGTC   | Polyketide-associated protein (Pap): Acetyltransferase involved in the PDIM and PGL synthesis, catalyzes the diesterification of phenolphthiocerols with mycocerosates.                            |
| <i>papA5_Rv</i>    | GGCAACGAGATTCCAACCG  |                                                                                                                                                                                                    |
| <i>ppsA_Fw</i>     | GGCATGGGATGTCGTTTCC  | Phthiocerol polyketide synthase subunit A: Part of the <i>Pps</i> ABCDE complex involved in the biosynthesis of the lipid core common to phthiocerols and phenolphthiocerols                       |
| <i>ppsA_Rv</i>     | GGCGTTCACAGAGAAAGTCC |                                                                                                                                                                                                    |
| <i>16S rRNA_Fw</i> | CAACGCGAAGAACCTTACCT | Housekeeping gene: Used as a constitutive expression control, useful for normalizing the expression level of genes of interest among samples.                                                      |
| <i>16S rRNA_Rv</i> | TGCACACAGGCCACAAGGGA |                                                                                                                                                                                                    |
